# Supplementary material
Source: PubMed Central journal article supplement (PMC6218449)
Supplement: 41422_2018_96_MOESM3_ESM.pdf [file 41422_2018_96_MOESM3_ESM.pdf]

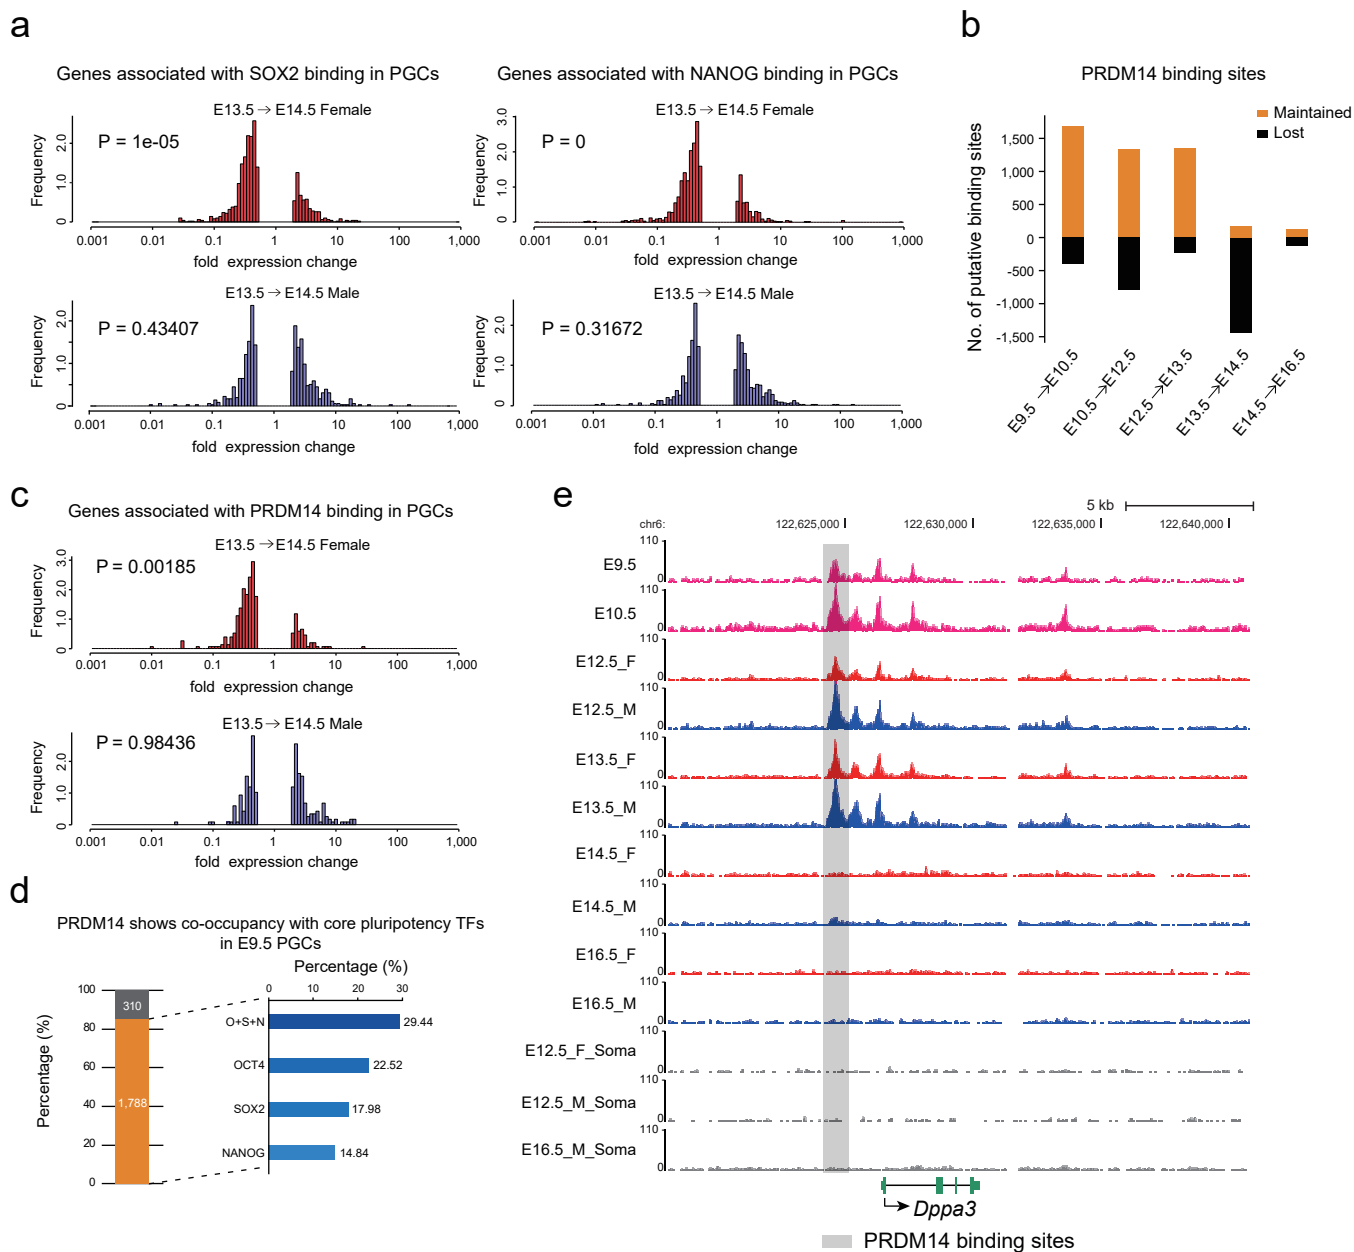

**Fig. S3 Analysis of pluripotency TF binding sites in mouse PGCs.** **a** The expression fold changes of genes associated with the lost SOX2 and NANOG binding sites (from E13.5 to E14.5) in mouse female (top) and male (bottom) PGCs. **b** The number of PRDM14 binding sites that are maintained and lost between adjacent developmental stages. **c** Left, bar indicating the number of PRDM14 binding sites and the percentage of these sites that have co-occupancy with core pluripotency TFs in E9.5 PGCs. Right, plot showing the percentage of core pluripotency TFs that have PRDM14 co-binding. **d** The expression fold changes of genes associated with the lost PRDM14 binding sites (from E13.5 to E14.5) in mouse female (top) and male (bottom) PGCs. **e** Genome browser view of DHS signal enrichment around the *Dppa3* loci in mouse PGCs and gonadal somatic cells. A PRDM14 binding site that is speculated to be responsible for *Dppa3* activation is marked.
