# Supplementary material
Source: PubMed Central journal article supplement (PMC6218449)
Supplement: 41422_2018_96_MOESM5_ESM.pdf [file 41422_2018_96_MOESM5_ESM.pdf]

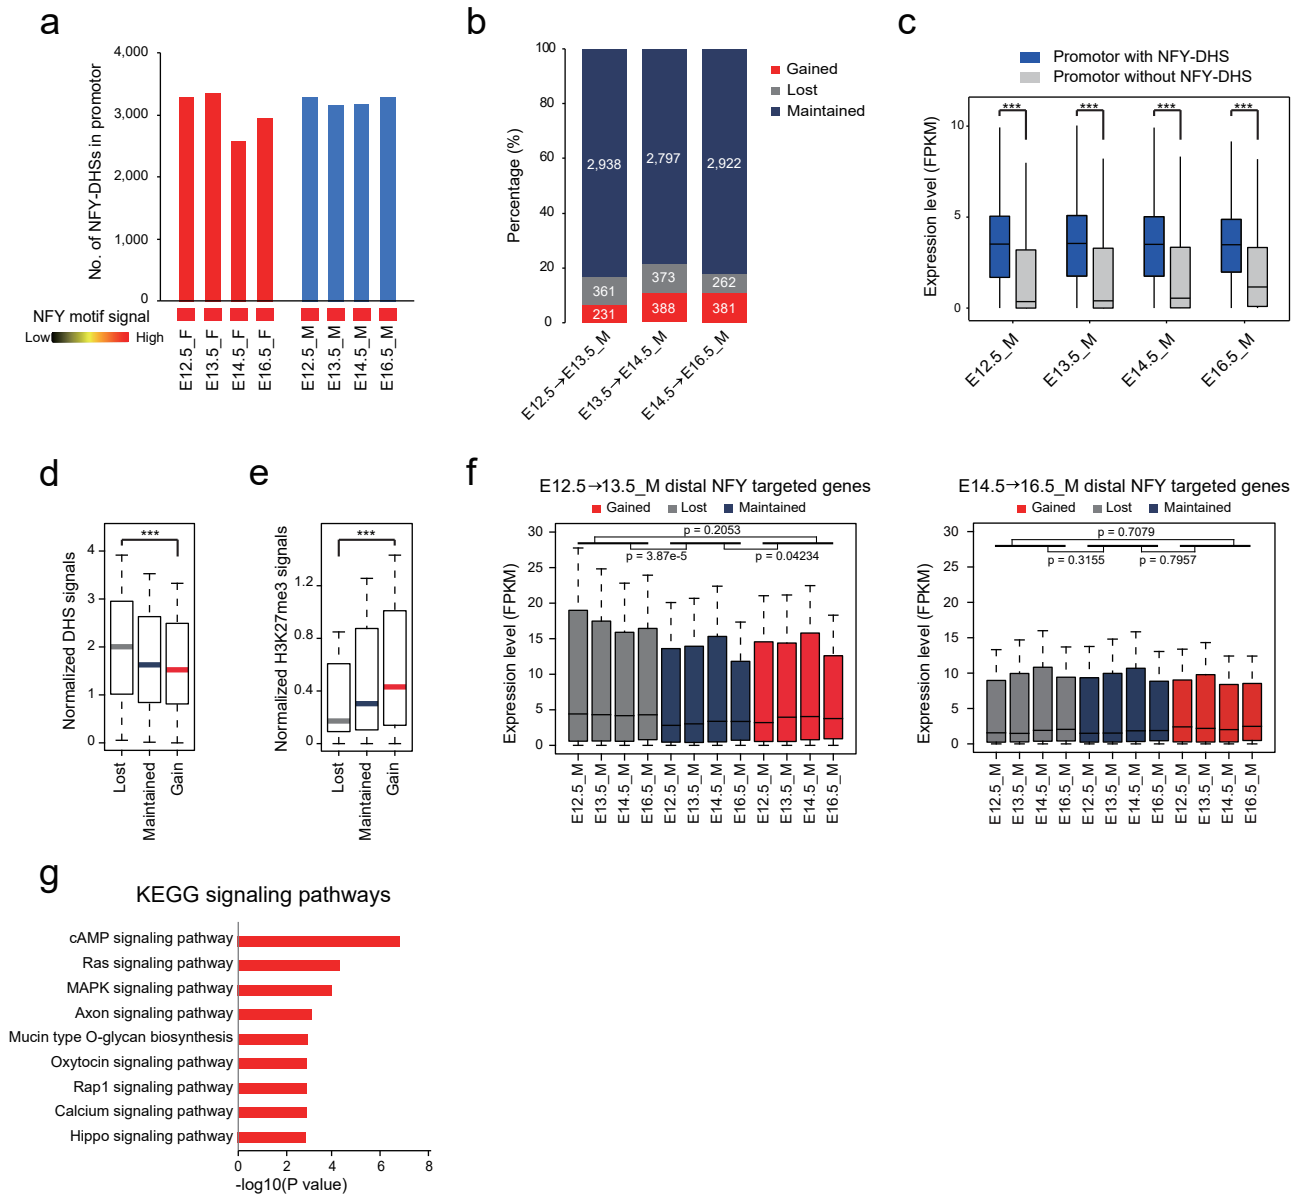

**Fig. S5 Analysis of NFY-DHSSs in mouse PGCs.** **a** Bar charts showing the numbers of proximal NFY-DHSSs in mouse female and male PGCs. The bottom heat maps showing the corresponding NFY motif enrichment at proximal DHSs. **b** Percentage of proximal NFY-DHSSs in male PGCs that were gained, lost and maintained during stage transitions. **c** Expression levels of genes containing or not containing proximal NFY-DHSSs. The difference is statistically significant by Wilcoxon rank sum test (\*\*\*) denotes  $p < 0.001$ ). **d** Genes associated with E14.5 gained, lost and maintained distal NFY-DHSSs have different DHS signals around the promoter regions. The difference is statistically significant by Wilcoxon rank sum test. **e** Genes associated with E14.5 gained, lost and maintained distal NFY-DHSSs have different H3K27me3 signals around the promoter regions. The difference is statistically significant by Wilcoxon rank sum test. **f** Expression levels of genes associated with the gained, lost and maintained distal NFY-DHSSs in male PGCs during E12.5 to E13.5 stage transition (left) and during E14.5 to E16.5 stage transition (right). Wilcoxon rank sum test was used to determine significance. **g** KEGG signaling pathways enriched in E14.5-gained distal NFY-DHSSs in male PGCs.
