# Supplementary material
Source: PubMed Central journal article supplement (PMC6218449)
Supplement: 41422_2018_96_MOESM6_ESM.pdf [file 41422_2018_96_MOESM6_ESM.pdf]

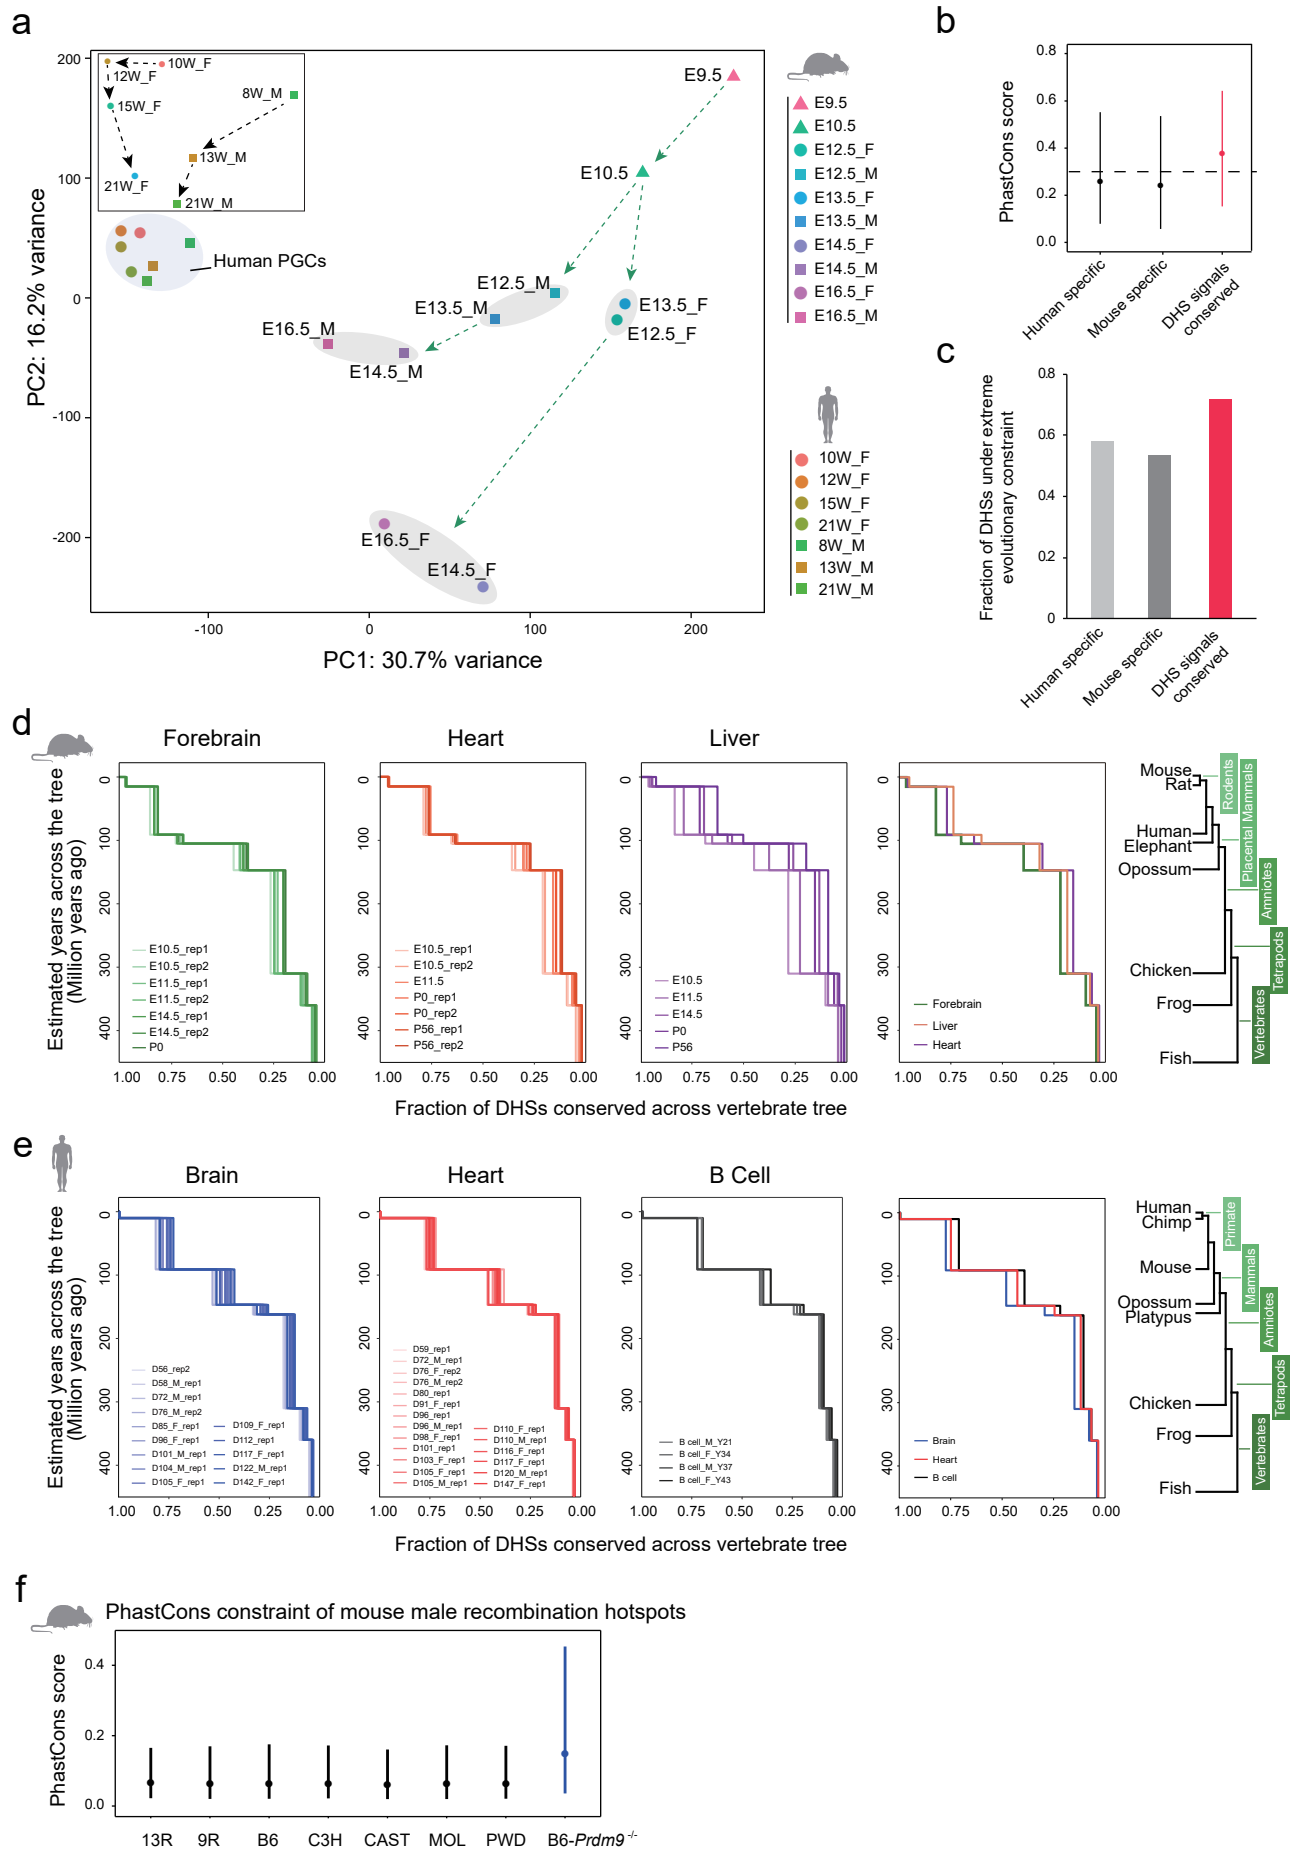

Fig. S6 See next page for caption.

**Fig. S6 Evolutionary conservation of CREs.** **a** PCA of DHS signals at orthologous regions between mouse and human PGCs across developmental stages. **b** PhastCons constraint of mouse and human orthologous regions. **c** The fractions of mouse and human orthologous regions that were under strong vertebrate constraint (score > 300). **d** Cumulative proportion of mouse DHSs conserved across the vertebrate tree as defined by sequence homology. Plots show mouse forebrain, heart, and liver across different development stages; the fourth plot shows the average evolutionary depth of these three tissues. **e** Similar analysis to **(d)** in human brain, heart and B cells. **f** PhastCons constraint of male hotspots from different wild-type strains and the *Prdm9*<sup>-/-</sup> B6 strain. (P = postnatal; D = day after birth; Y = year).
